# Supplementary material for: Nanoflake driven Mn2O3 microcubes modified with cooked rice derived carbon for improved electrochemical behavior
Source: Royal Society of Chemistry journal article supplement (doi:10.1039/c4ra11443d), 2014-12-06
Supplement: c4ra11443d1.pdf [file c4ra11443d1.pdf]

**Electronic Supplementary Information (ESI)**

**Nanoflake Driven Mn<sub>2</sub>O<sub>3</sub> Microcubes Modified with Cooked Rice Derived Carbon for  
Improved Electrochemical Behavior**

**B. Chandra Sekhar<sup>a</sup>, Ganguli Babu<sup>b</sup> and N. Kalaiselvi<sup>a\*</sup>**

**<sup>a</sup>CSIR-Central Electrochemical Research Institute, Karaikudi-630 006, Tamilnadu,  
India.**

**<sup>b</sup>Wayne State University-Department of Mechanical Engineering, Michigan 48202-  
3902, U.S.A.**

## Supporting information

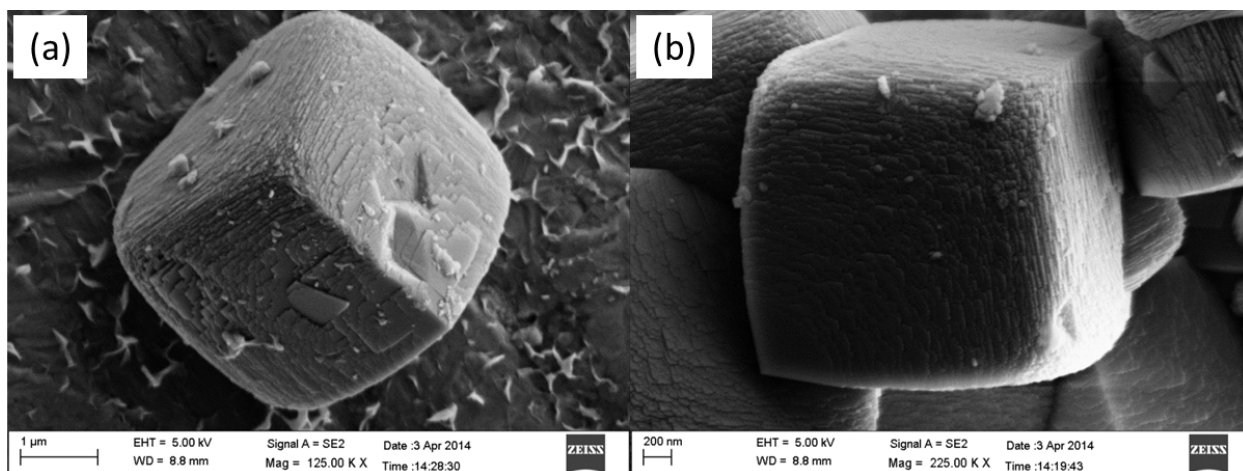

Fig. S1 (a-b) SEM images of MnCO<sub>3</sub> microcubes containing nano flakes

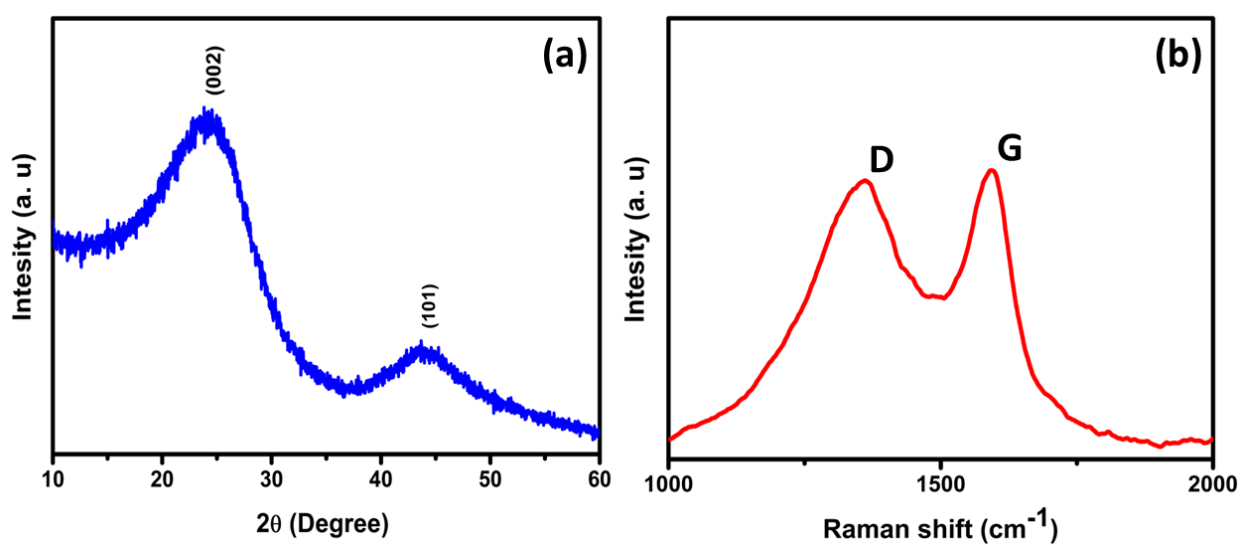

Fig. S2 a) XRD and b) Raman behavior of cooked rice carbon (CRC)

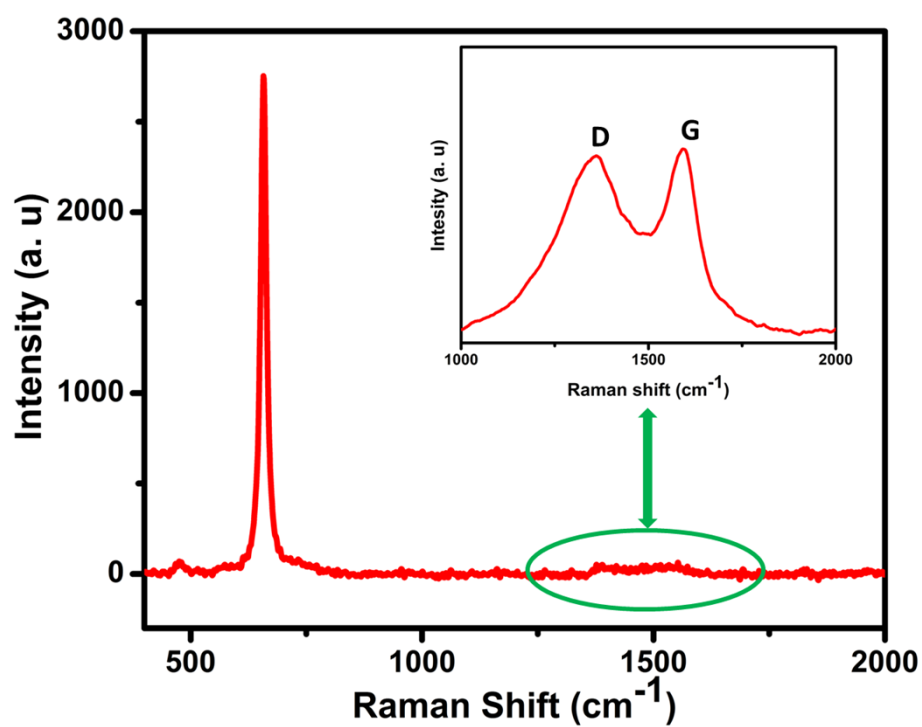

**Fig. S3** Complete Raman spectrum of Mn<sub>2</sub>O<sub>3</sub>/CRC-20 composite

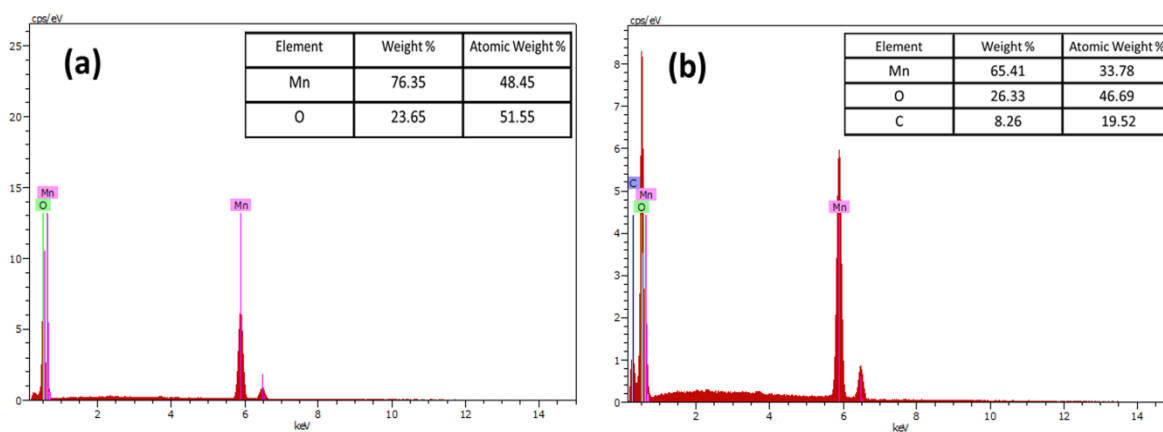

**Fig. S4** EDX results of a) pristine Mn<sub>2</sub>O<sub>3</sub> and b) Mn<sub>2</sub>O<sub>3</sub>/CRC-20 composite

Inset of a and b: Table showing the percentage composition of elements present in Mn<sub>2</sub>O<sub>3</sub> and Mn<sub>2</sub>O<sub>3</sub>/CRC-20 composite respectively

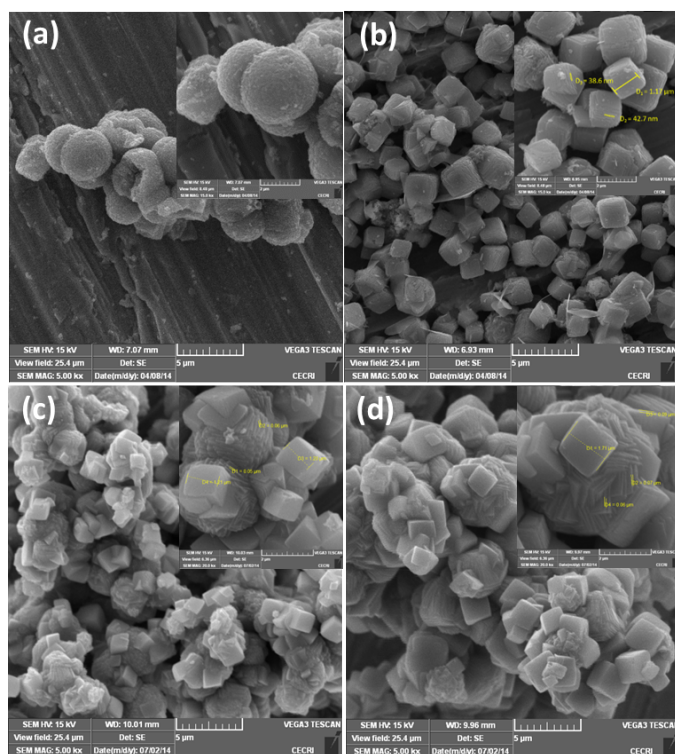

**Fig. S5** SEM images of Mn<sub>2</sub>O<sub>3</sub> obtained by varying the rate of addition of (NH<sub>4</sub>)HCO<sub>3</sub> precursor, (a) spheres obtained in 30 min, (b) cubes obtained in 2 h, (c-d) agglomerated cubes obtained in 3 and 4 h; Insets: Respective closer view

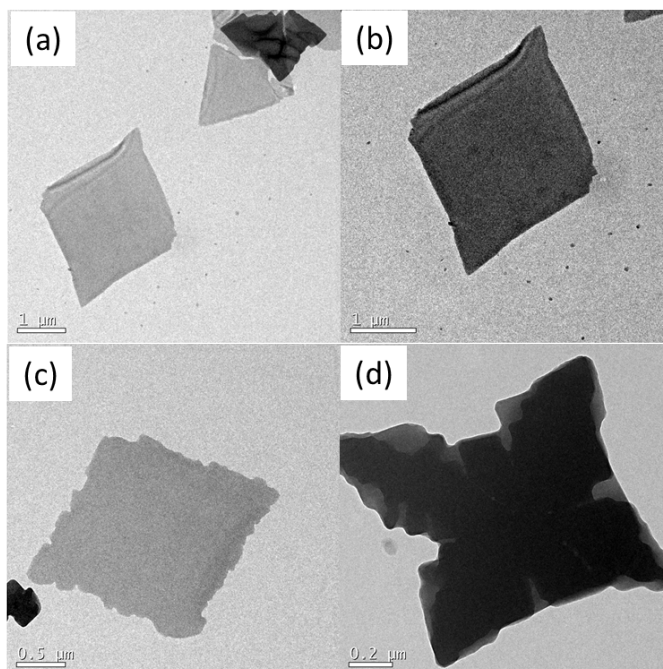

**Fig. S6** (a-d) Closer view of TEM images of Mn<sub>2</sub>O<sub>3</sub> nano flakes (obtained from 2 h addition time)

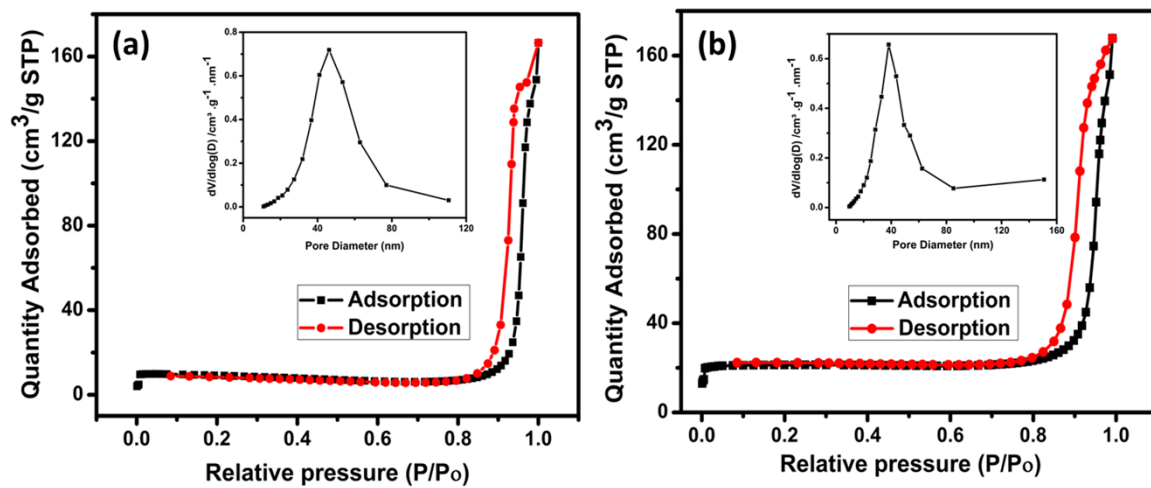

**Fig. S7** N<sub>2</sub> adsorption-desorption isotherm of (a) Mn<sub>2</sub>O<sub>3</sub> and (b) Mn<sub>2</sub>O<sub>3</sub>/CRC-20 composite
